# Supplementary material for: Monitoring bicosomes containing antioxidants in normal and irradiated skin
Source: Royal Society of Chemistry journal article supplement (doi:10.1039/c6ra11170j), 2016-01-01

**Fig. S1** IR maps of A1 vibration obtained for normal and irradiated skin treated with different bicosomes (without the superimposition of colour maps). A) Normal skin treated with Bc $\beta$  system, B) normal skin treated with BcMn system, C) irradiated skin treated with Bc $\beta$  system and D) irradiated skin treated with BcMn system. The scale goes from blue to red, indicating no amount of C<sub>12</sub>Re(CO)<sub>3</sub> derivative in blue colour and high amount of this molecule in red colour. SC: Stratum corneum, Epi: Epidermis. The red points indicate the areas in which the spectra are calculated.

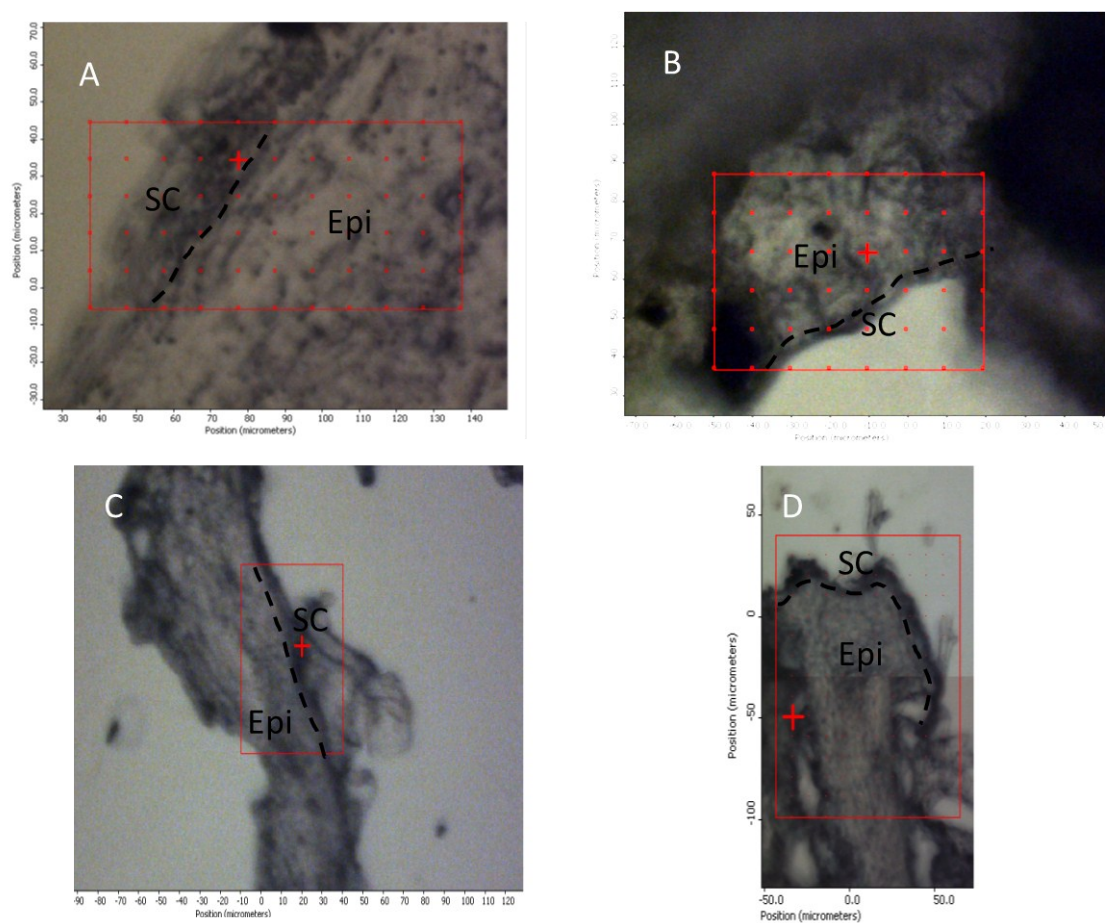

Supplement: c6ra11170j1.pdf [file c6ra11170j1.pdf]
